# Supplementary material
Source: publisher site journal article supplement (https://www.dovepress.com/article/232279)
Supplement: Supplementary file 1 [file get_supplementary_file.php]

# sup Figure 1

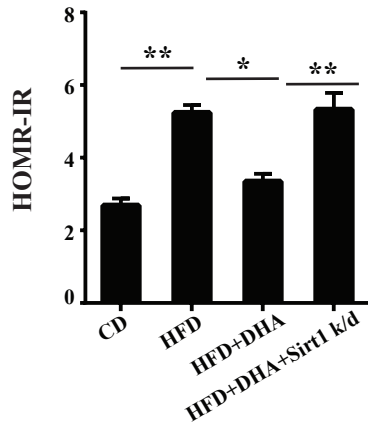

## s. Figure 1 HOMA-IR index in mice.

HOMA-IR index in mice. All data are expressed as fold change compared with CD control group. Values are means  $\pm$  S.D. (n = 6, \* $p$  < 0.05; \*\* $p$  < 0.01).
